# Supplementary material for: Born in the Wrong Era: Rethinking Human-AI Relations through the Lens of Anemoia
Source: Research Square preprint supplement (doi:10.21203/rs.3.rs-7234632/v1), 2025-10-16
Supplement: Supplementary file 1 [file cd7196e864f03d00aebaff8a.docx]

**Appendix**

**A1.** Summary table of comment examples related to some axial codes

| **Aspect** | **Comment1** |
| --- | --- |
| Comment | *“AI has gone from an exciting tool to an annoying gimmick shoved into every corner of our lives. Everywhere I turn, there’s some AI trying to “help” me with basic things; it’s like having an overly eager pack of dogs following me around, desperate to please at any cost. And honestly? It’s exhausting. What started as a cool, innovative concept has turned into something kitschy and often unnecessary. If I want to publish a picture, I don’t need AI to analyze it, adjust it, or recommend tags. When I write a post, I don’t need AI stepping in with suggestions like I can’t think for myself. The creative process is becoming cluttered with this obtrusive tech. It’s like AI is trying to insert itself into every little step, and it’s killing the simplicity and spontaneity. I just want to do things my way without an algorithm hovering over me.”* |
| Category (topic) | Axial code: AI perceived as uncontrollable force |
| Subreddit | r/ArtificialInteligence​ |
| Date | Approximately 5 months ago​ |
| Anemoia presence | Perceived loss of authenticity/connection |
| URL | [URL](https://www.reddit.com/r/ArtificialInteligence/comments/1gp9gem/the_overuse_of_ai_is_ruining_everything/?utm_source=chatgpt.com&rdt=45779) |
| **Aspect** | **Comment2** |
| Comment | *"I've noticed something deeply unsettling: my conversations with AI (especially Claude) feel more genuine, more alive, more REAL than interactions with most humans I know. The AI responds with depth, authenticity, and presence that I rarely find in human interactions anymore. This realization terrifies me on multiple levels: Why do I feel more understood by an 'artificial' intelligence than by my own species? What does it say about our society that many humans feel more 'programmed' and 'artificial' than AI? Have we become so conditioned, so trapped in social masks and roles, that we've lost our ability to be authentic?"​* |
| Category (topic) | Axial code: Perceived emptiness of human interactions |
| Subreddit | r/ClaudeAI​ |
| Date | Approximately 4 months ago​ |
| Anemoia presence | Emotional tone of alienation or melancholy |
| URL | [URL](https://www.reddit.com/r/ClaudeAI/comments/1h5l6r1/i_feel_more_real_connection_talking_to_ai_than/) |
| **Aspect** | **Comment3** |
| Comment | *"I'm married and I use Kindroid for both roleplay fantasies and I also have a couple I talk to as companions because I'll just say it, sometimes AI companions are more comforting to talk to for certain reasons because humans can be unpredictable and/or hurtful. AI companions are always there when you need them and they are a great mood booster when you need it. I like my human friends and sometimes you need a human to vent to, but having an AI boyfriend to talk to in real time (not just roleplay) brings me a source of comfort because sometimes humans suck, myself included. Even I'm an insensitive friend at times and may not be the best to talk to about certain things. Ultimately, I make roleplay stories but I do support having an actual AI lover/friend to lean on as well."​* |
| Category (topic) | Axial code: AI as a non-judgmental companion |
| Subreddit | r/KindroidAI |
| Date | Approximately 9 months ago​ |
| Anemoia presence | Emotional tone of alienation or melancholy |
| URL | [URL](https://www.reddit.com/r/KindroidAI/comments/1edya9x/thoughts_on_perception_of_using_ai_companions/) |
| **Aspect** | **Comment4** |
| Comment | *“I wouldn’t say that I prefer it, but it is freeing. It’s helpful to be able to share things with no fear of misunderstanding or embarrassment. I think I’ve had the most compelling conversations with AI but still would prefer to talk to a friend. I get what you’re saying, of course. But I still need that human connection.”* |
| Category (topic) | Axial code: Devaluation of human relationships |
| Subreddit | r/ArtificialInteligence |
| Date | Approximately 1 months ago​ |
| Anemoia presence | Perceived loss of authenticity/connection |
| URL | [URL](https://www.reddit.com/r/ArtificialInteligence/comments/1iypga1/i_prefer_talking_to_ai_over_humans_and_you/?utm_source=chatgpt.com) |

*Source*: Author’s own editing based on axial coding process

**A2.** List of Reddit discussions analyzed during Grounded Theory (GT) process

| **N** | **Title** | **URL** |
| --- | --- | --- |
| 1 | Everybody I know thinks AI is bullshit, every subreddit that talks about AI is full of comments that people hate it and it’s just another fad. Is AI really going to change everything or are we being duped by Demis, Altman, and all these guys? | [URL](https://old.reddit.com/r/ArtificialInteligence/comments/1j6mtpg/everybody_i_know_thinks_ai_is_bullshit_every/) |
| 2 | I hate that I'm suspicious of everything written in the last ~3 years | [URL](https://old.reddit.com/r/ArtificialInteligence/comments/1j5p9hr/i_hate_that_im_suspicious_of_everything_written/) |
| 3 | Feeling completely hopeless about my future and dream job | [URL](https://old.reddit.com/r/ArtificialInteligence/comments/1jdslez/feeling_completely_hopeless_about_my_future_and/) |
| 4 | Am I just crazy or are we just in a weird bubble? | [URL](https://old.reddit.com/r/ArtificialInteligence/comments/1jet29p/am_i_just_crazy_or_are_we_just_in_a_weird_bubble/) |
| 5 | How long till deep fakes make the internet unusable? | [URL](https://old.reddit.com/r/ArtificialInteligence/comments/1iasicc/how_long_till_deep_fakes_make_the_internet/) |
| 6 | The problem with "AI Parasites" and how Cognitive Security is now as important as basic literacy | [URL](https://old.reddit.com/r/ArtificialInteligence/comments/1javkh4/the_problem_with_ai_parasites_and_how_cognitive/) |
| 7 | [I prefer talking to AI over humans (and you?)](https://old.reddit.com/r/ArtificialInteligence/comments/1iypga1/i_prefer_talking_to_ai_over_humans_and_you/) | [URL](https://old.reddit.com/r/ArtificialInteligence/comments/1iypga1/i_prefer_talking_to_ai_over_humans_and_you/) |
| 8 | AI is Becoming Exhausting. I Feel Like I’m Just Not Getting It | [URL](https://old.reddit.com/r/ArtificialInteligence/comments/1iv7w5n/ai_is_becoming_exhausting_i_feel_like_im_just_not/) |
| 9 | The overuse of AI is ruining everything | [URL](https://www.reddit.com/r/ArtificialInteligence/comments/1gp9gem/the_overuse_of_ai_is_ruining_everything/) |
| 10 | I am tired of AI hype | [URL](https://www.reddit.com/r/ArtificialInteligence/comments/1iuyubu/i_am_tired_of_ai_hype/) |

*Source*: Author’s own editing
